# Supplementary material for: Learning dynamic treatment strategies for coronary heart diseases by artificial intelligence: real-world data-driven study
Source: PubMed Central journal article supplement (PMC8845235; doi:10.1186/s12911-022-01774-0), 2022-02-15
Supplement: 12911_2022_1774_MOESM2_ESM.pdf [file 12911_2022_1774_MOESM2_ESM.pdf]

Demographics and diagnoses

Gender: Female  
 Age: 72  
 Weight: 82.8kg  
 Diagnose ICD9 code: 41031, 42822, 41401, 42731, 25000, 4280, ...  
 (Acute myocardial infarction, Chronic systolic heart failure, Coronary atherosclerosis, Atrial fibrillation, Diabetes mellitus, Congestive heart failure, ...)

Scaled time series variables averaged by day

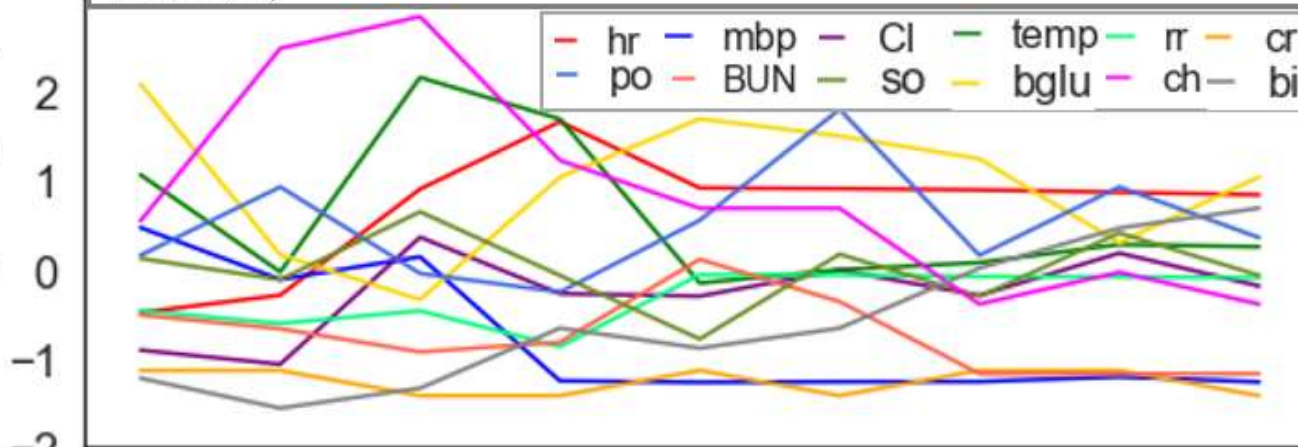

- 1/2 NS
- Heparin
- Captopril
- D5W
- Magnesium Sulfate
- Lorazepam
- Metoprolol
- Aspirin EC
- Insulin
- Furosemide

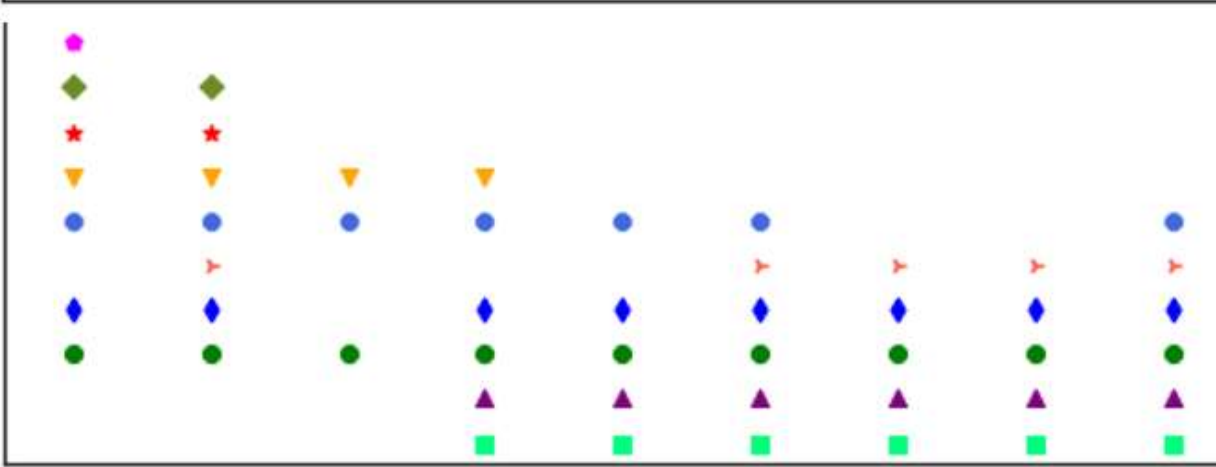

1 2 3 4 5 6 7 8 9

Day in hospital
