# Supplementary material for: Learning dynamic treatment strategies for coronary heart diseases by artificial intelligence: real-world data-driven study
Source: PubMed Central journal article supplement (PMC8845235; doi:10.1186/s12911-022-01774-0), 2022-02-15

## A. Actor network $\mu(S|\theta^\mu)$ and $\mu'(S|\theta^{\mu'})$

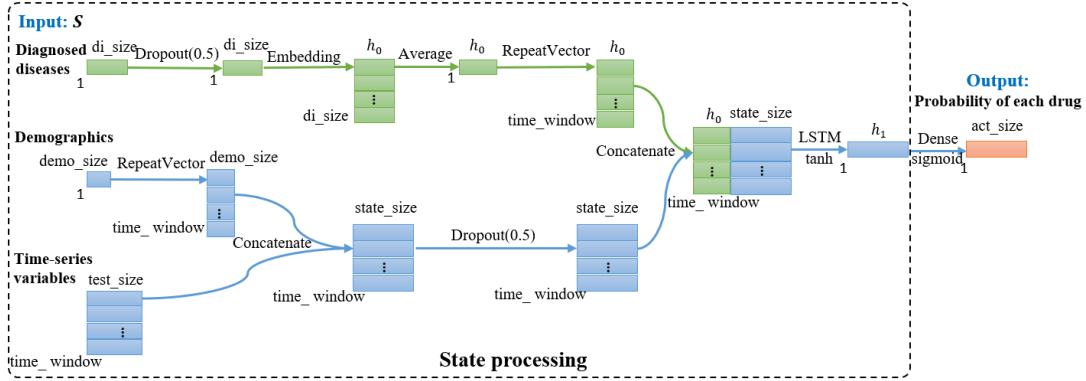

## B. Critic network $Q(S, A|\theta^Q)$ and $Q'(S, A|\theta^{Q'})$

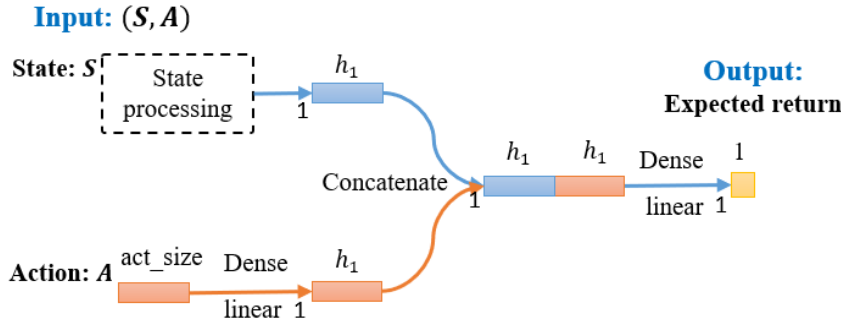

## C. Training process of the SRL-LSTM model

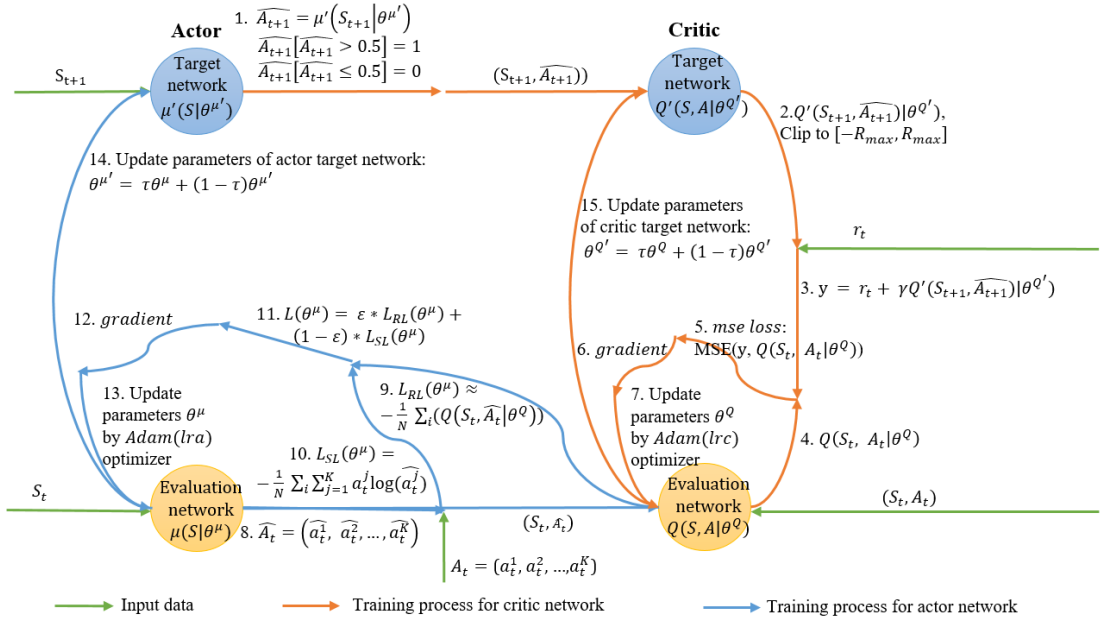

Supplement: 12911_2022_1774_MOESM3_ESM.pdf [file 12911_2022_1774_MOESM3_ESM.pdf]
